# Supplementary material for: Altered structural connectivity in olfactory disfunction after mild COVID-19 using probabilistic tractography
Source: Springer Nature journal article supplement (doi:10.1038/s41598-023-40115-7), 2023-08-09
Supplement: MOESM1 [file 41598_2023_40115_MOESM1_ESM.pdf]

# Altered structural connectivity in olfactory dysfunction after mild COVID-19 using probabilistic tractography

## Authors:

Diógenes Diego de Carvalho Bispo<sup>1,2,3,\*#</sup>, Pedro Renato de Paula Brandão<sup>4,5,#</sup>, Danilo Assis Pereira<sup>6</sup>, Fernando Bisinoto Maluf<sup>3</sup>, Bruna Arrais Dias<sup>3</sup>, Hugo Rafael Paranhos<sup>3</sup>, Felipe von Glehn<sup>2,5</sup>, Augusto César Penalva de Oliveira<sup>7</sup>, Alexandre Anderson de Sousa Munhoz Soares<sup>2</sup>, Maxime Descoteaux<sup>8,9,##</sup>, and Neysa Aparecida Tinoco Regattieri<sup>2,##</sup>

# Both authors share the first authorship.

## Both authors share senior authorship.

## Supplementary Information

**Supplementary Table S1.** Group comparison of COMMIT2-weighted connectivity matrices of the whole-brain network between COV- and COV+. Significance was thresholded at  $p < 0.05$ . Permutations = 5,000.

| CONTROL > COVID-19  |                           |      |                 |
|---------------------|---------------------------|------|-----------------|
| Node 1              | Node 2                    | t    | $t_{thr} = 3.0$ |
| Postcentral gyrus R | Inferior parietal gyrus L | 3.60 | X               |
| Postcentral gyrus R | Precuneus L               | 3.83 | X               |

Abbreviations: L, left; R, right; thr, threshold.

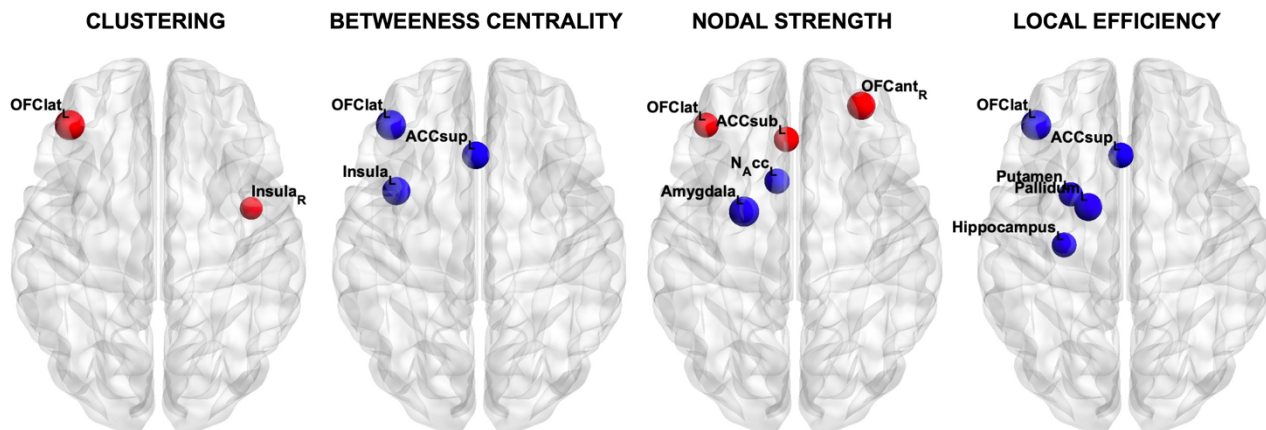

**Supplementary Figure S1.** Difference of local network metrics in olfactory-related regions between COV+ and COV- ( $p < 0.05$  uncorrected). The size of the node represents the significance of difference between two groups.

Abbreviations: OFClat, lateral orbital gyrus; OFCant, anterior orbital gyrus; ACCsup, anterior cingulate cortex (supracallosal); ACCsub, anterior cingulate cortex (subgenual); NAcc, nucleus accumbens, R, right; L, left.
